# Supplementary material for: Reducing non-attendance rates in a community mental health team
Source: PubMed Central journal article supplement — BMJ Qual Improv Rep. 2014 Sep 12;3(1):u202228.w1114. doi: 10.1136/bmjquality.u202228.w1114 (PMC4949624; doi:10.1136/bmjquality.u202228.w1114), 2014-09-12
Supplement: bmjqir.u202228.w1114-s1.pdf [file bmjqir.u202228.w1114-s1.pdf]

**THE FOLLOWING QUESTIONNAIRE IS ANONYMOUS**

1. Please tick one of the boxes for the question below:

**Over the past two years I have missed appointment(s) with my psychiatrist or care coordinator on:**

- One Occasion
- Two Occasions
- More than two occasions
- I have never missed an appointment with my psychiatrist/ care coordinator.

2. Please tick as many boxes as you feel applicable to you in terms of the question below.

**If you have missed at least one appointment, what do you think was the reason?**

- I forgot I had an appointment.
- I wasn't taking my medication and was too embarrassed to tell my psychiatrist/ care coordinator.
- I had a previous bad experience with appointments.
- It was too expensive for me to attend the appointment.
- I had no means of transport to attend the appointment.
- I do not like the way my psychiatrist/ care coordinator sees me as a person with medical illness.
- The appointment I was given was not convenient for me.
- The appointments were very infrequent.
- I felt there was a stigma for me when people saw me entering the building.
- I did not like my psychiatrist/ care coordinator. Reason.....
- I did not find the appointments helpful.
- I do not have a mental illness.
- I have a mental illness but I don't think I need to see my psychiatrist/ care coordinator.
- Other reason.....

**3. What can we do differently to help you attend your appointments?**

.....

*Thank you very much for taking the time to complete*
