# Supplementary material for: Reducing non-attendance rates in a community mental health team
Source: PubMed Central journal article supplement — BMJ Qual Improv Rep. 2014 Sep 12;3(1):u202228.w1114. doi: 10.1136/bmjquality.u202228.w1114 (PMC4949624; doi:10.1136/bmjquality.u202228.w1114), 2014-09-12
Supplement: bmjqir.u202228.w1114-s3.pdf [file bmjqir.u202228.w1114-s3.pdf]

# DNA rates by team

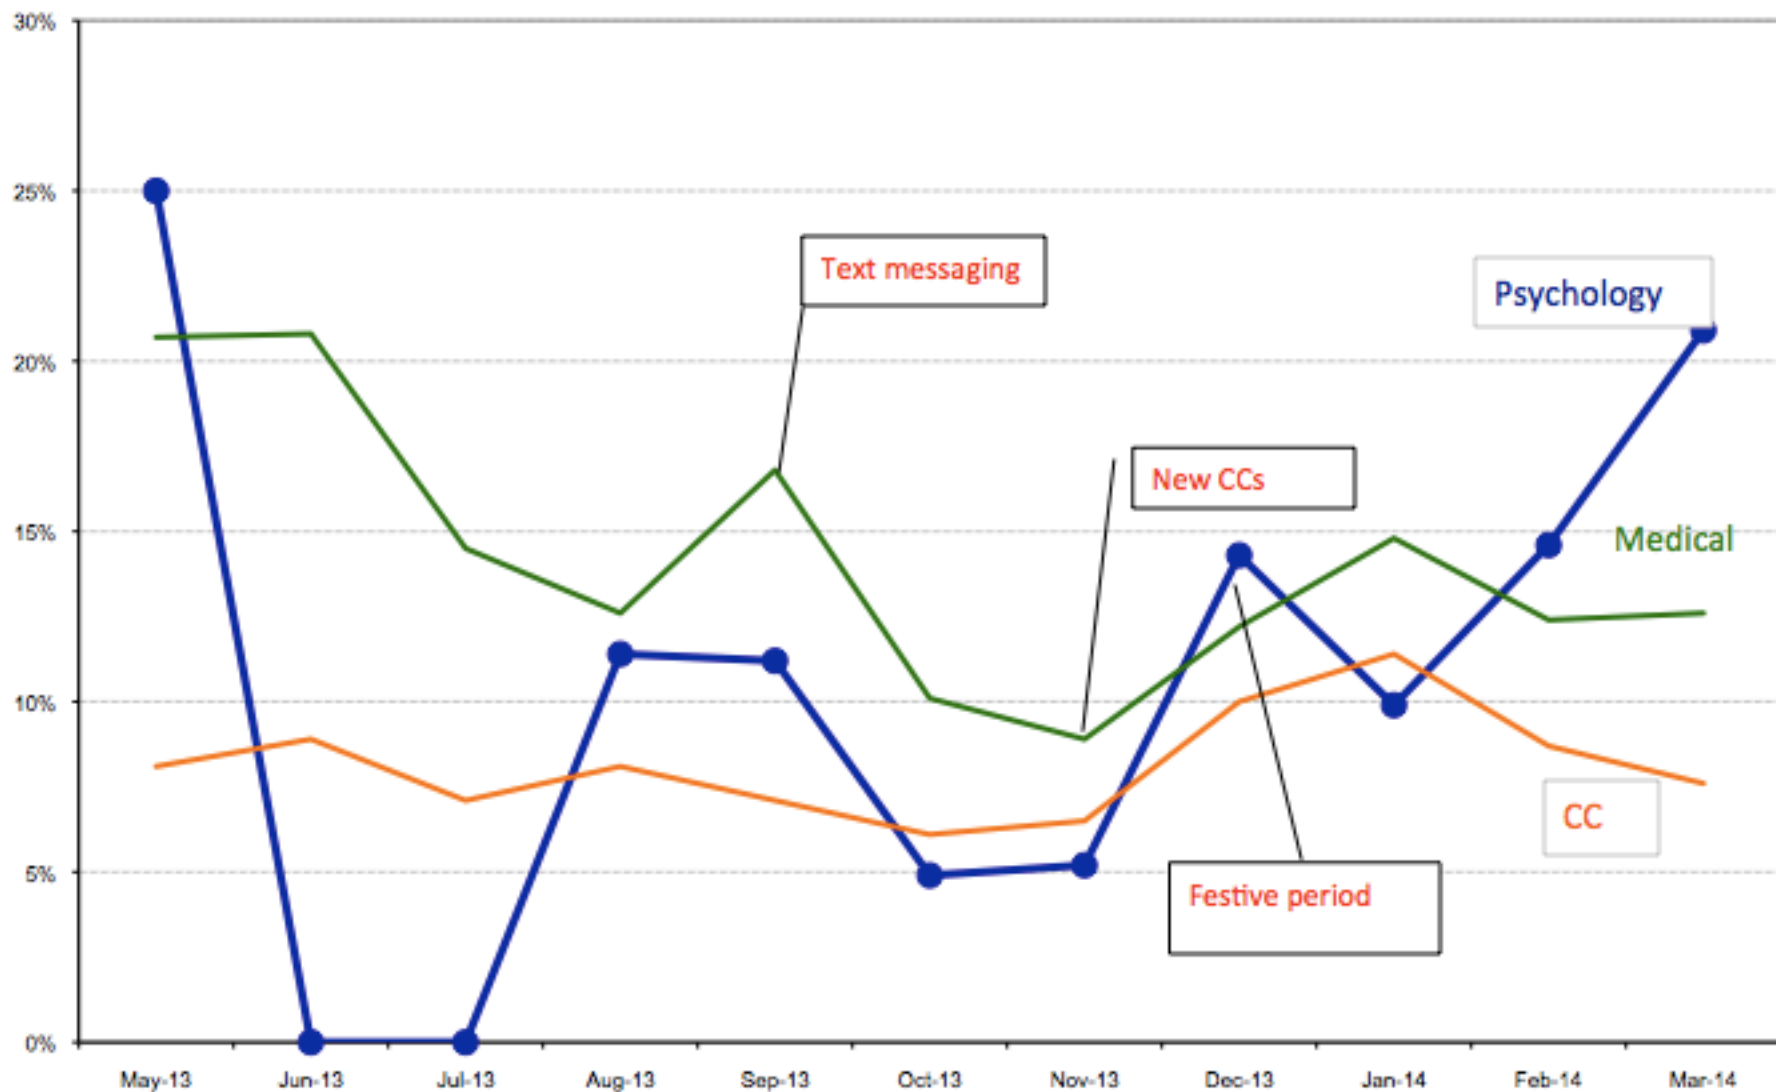

## Overall DNA rate

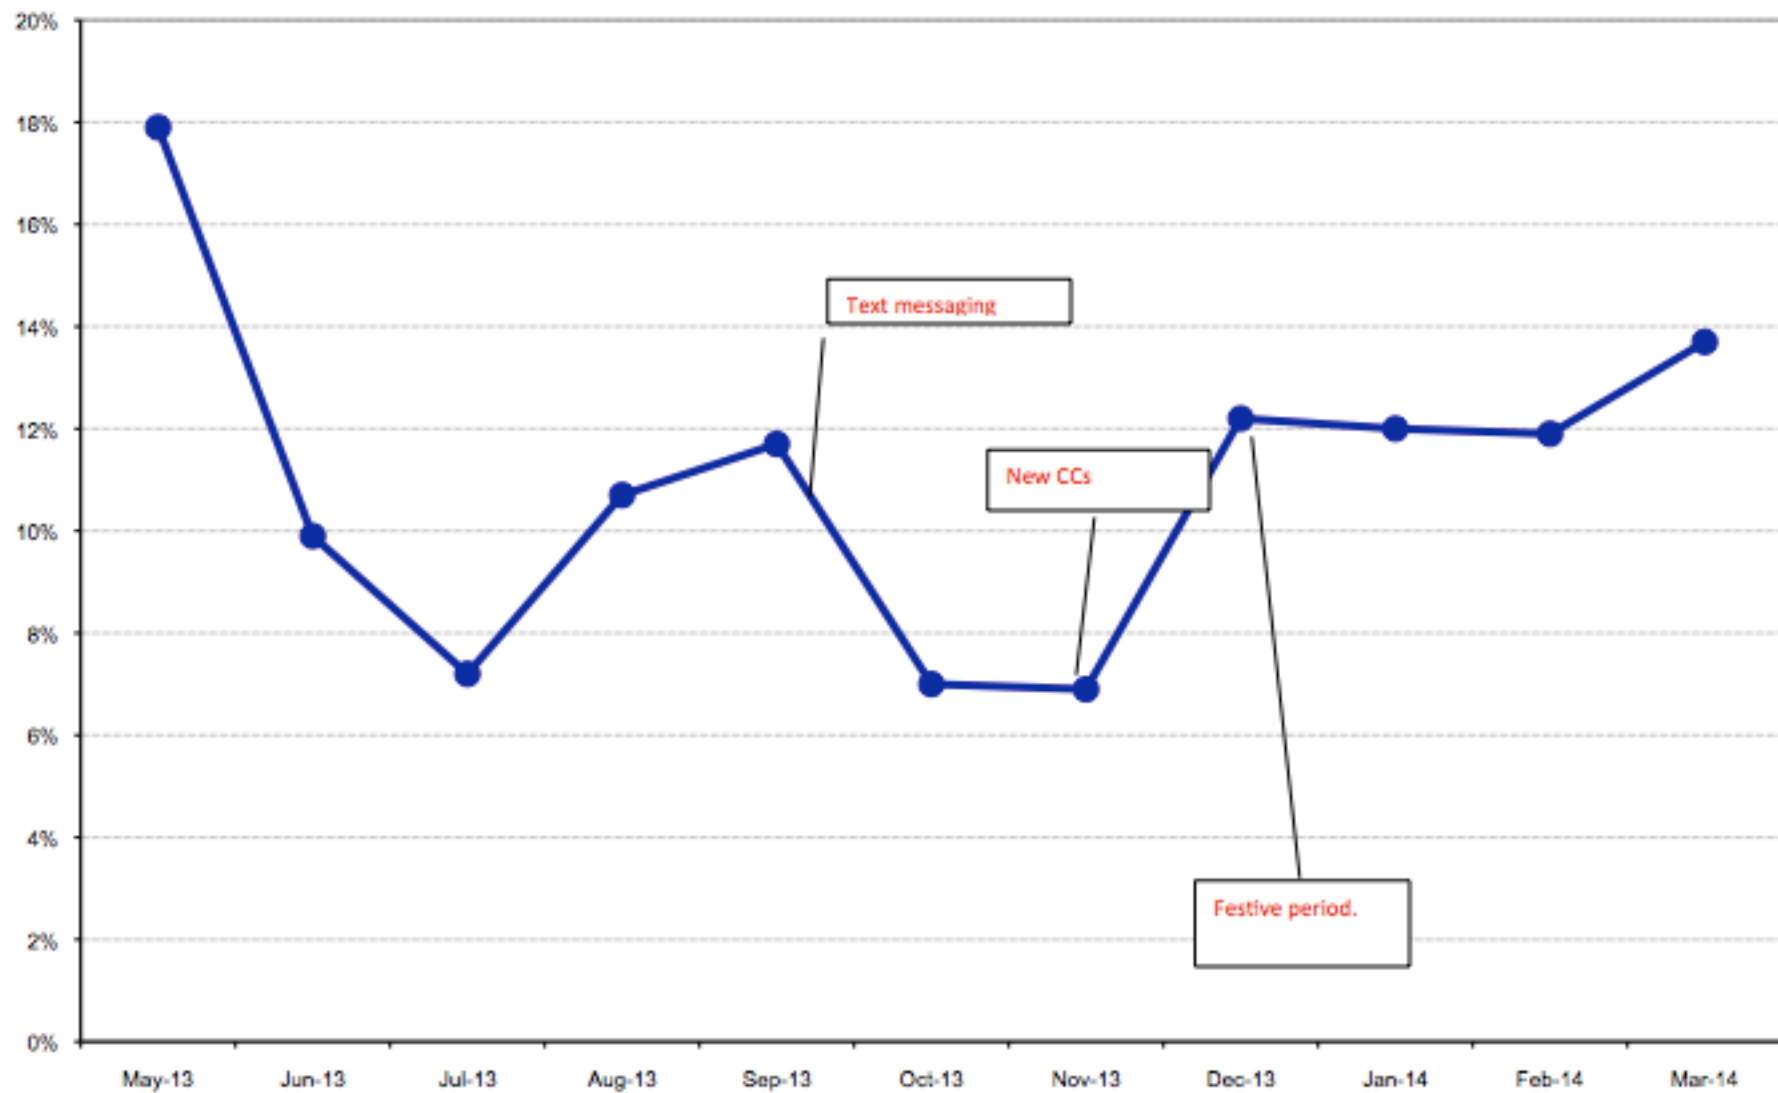

## Follow up contact

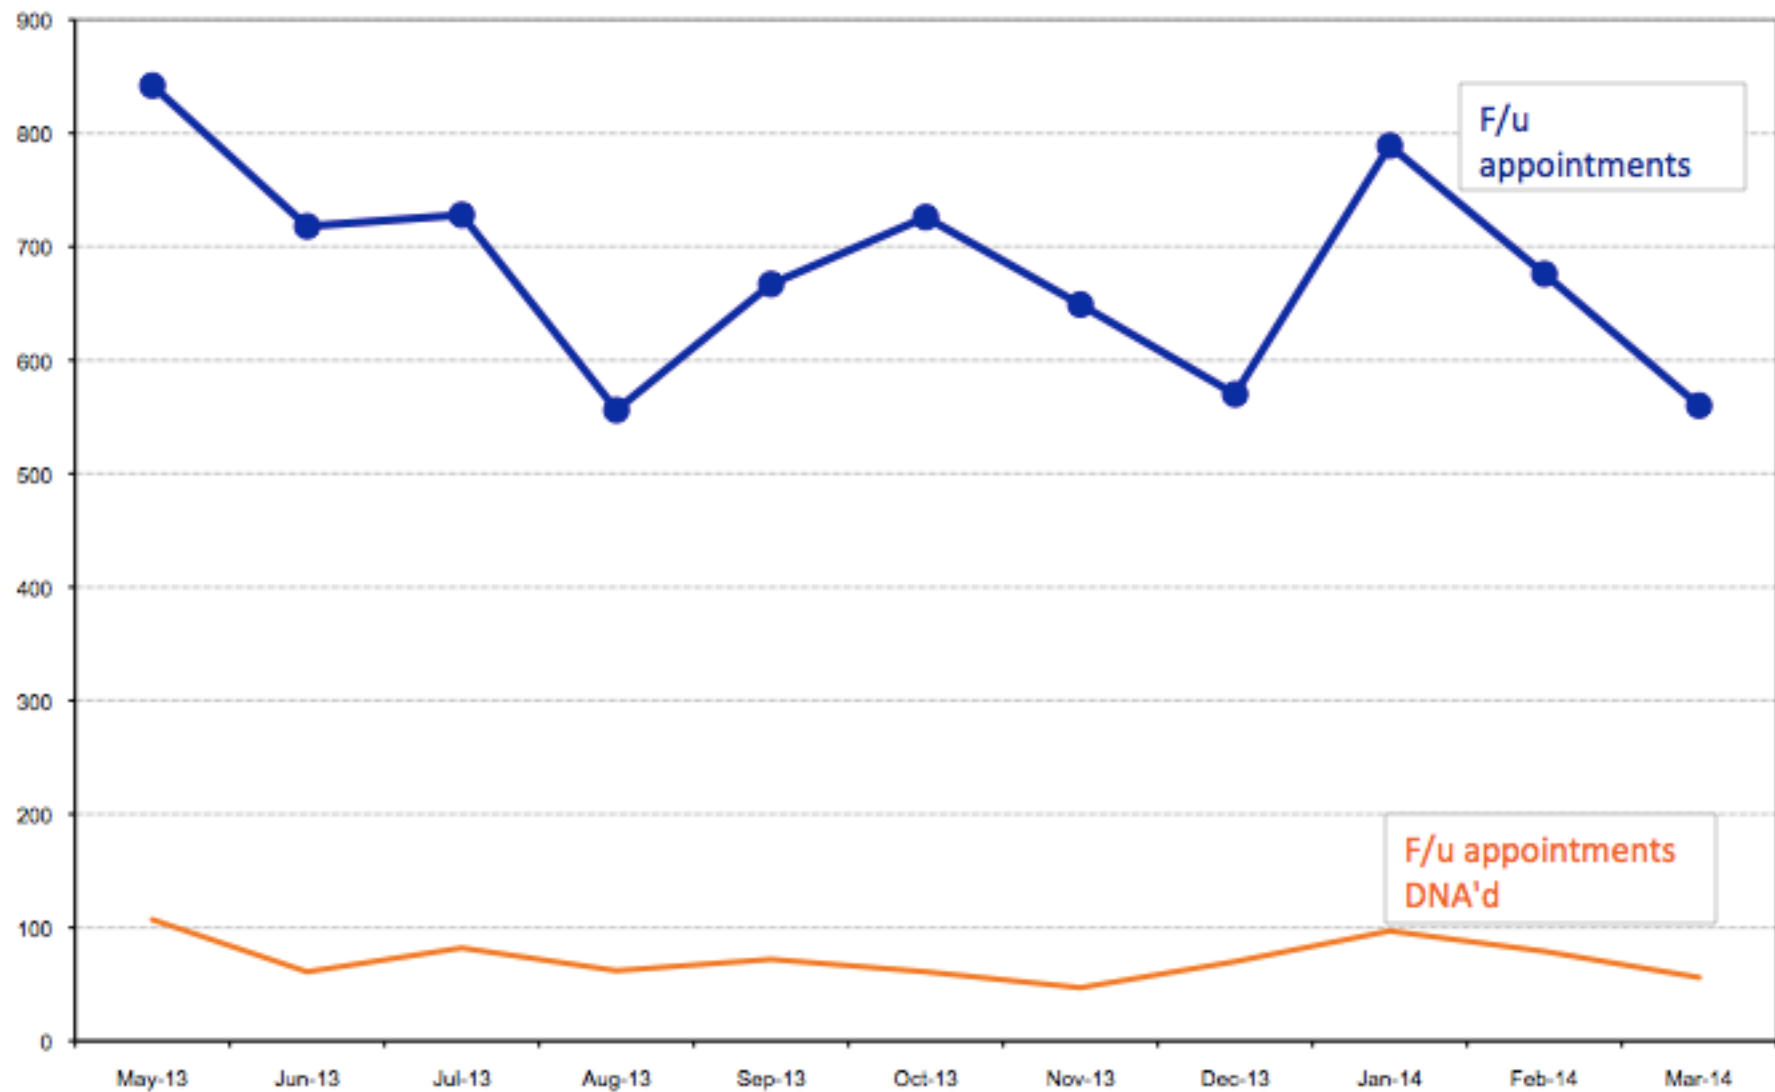

## New appointments

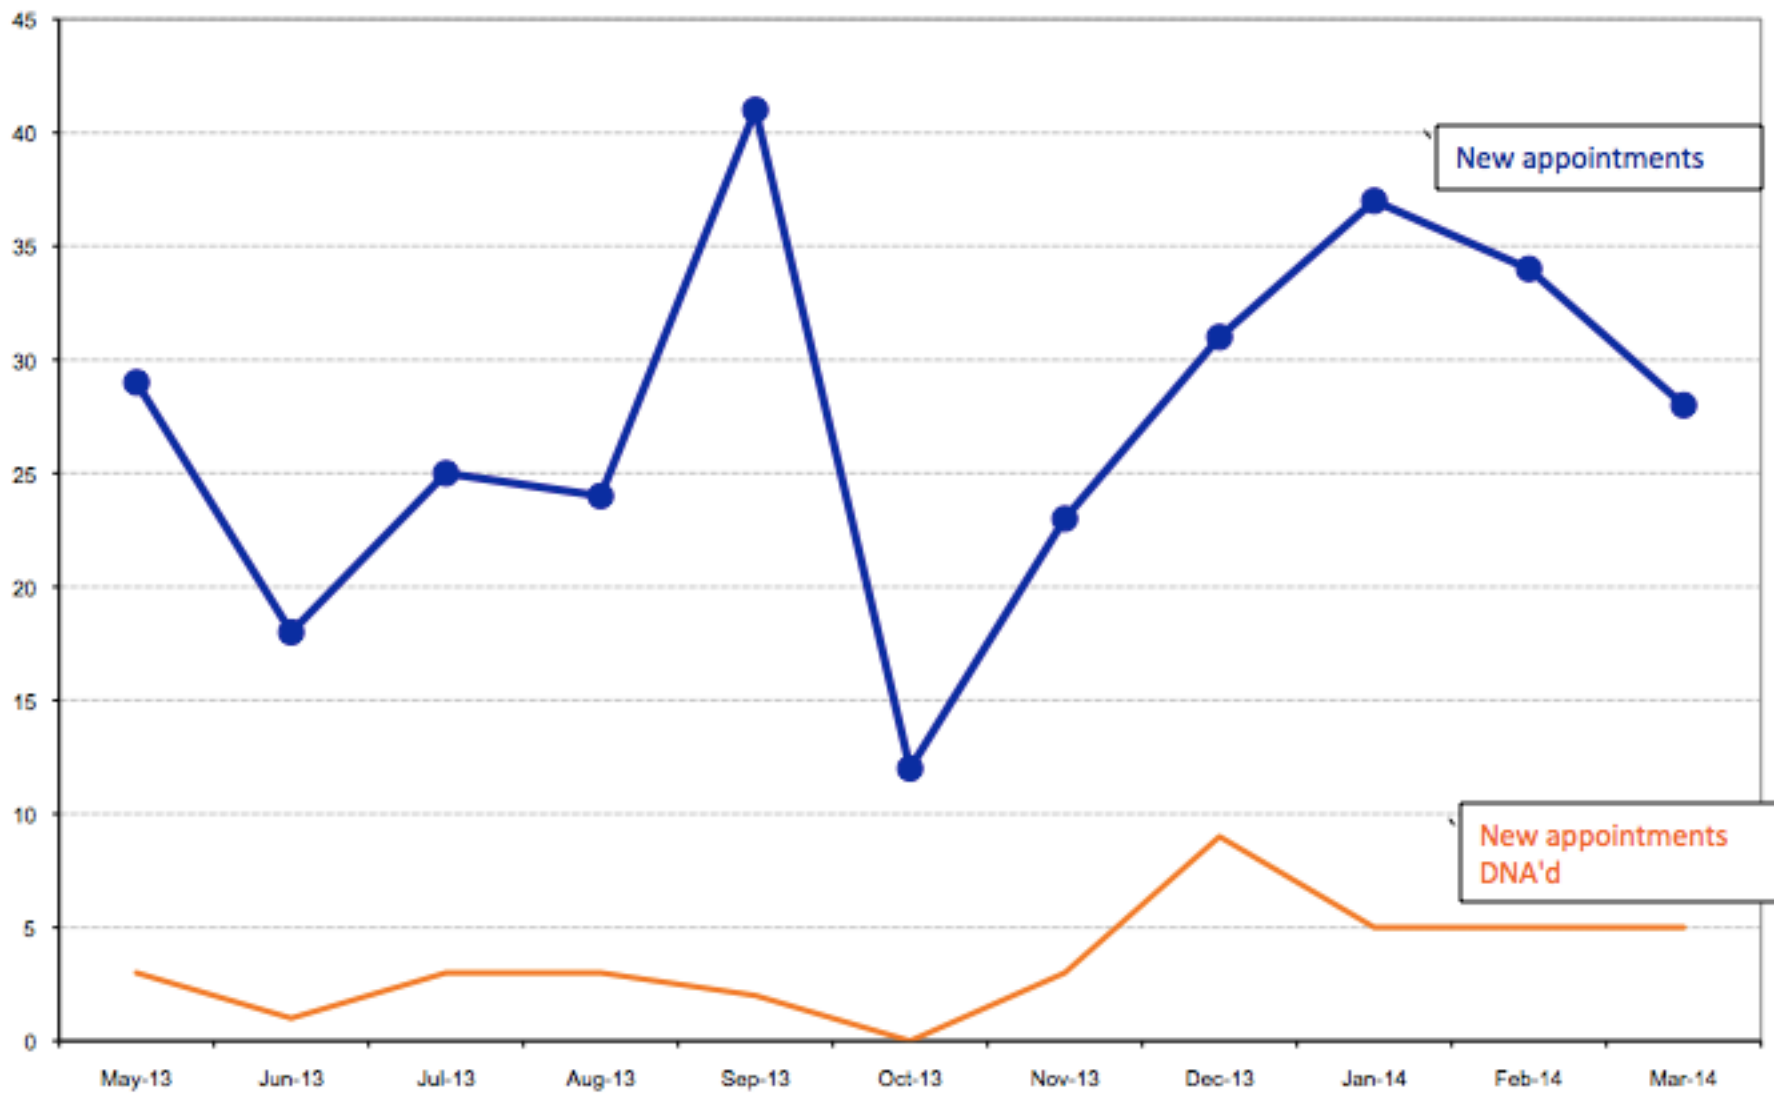

|                   | Group A average DNA rate (before intervention) | Group B average DNA rate (after intervention) |
|-------------------|------------------------------------------------|-----------------------------------------------|
| Psychology        | 9.4%                                           | 11.6%                                         |
| Care coordination | 8.3%                                           | 8%                                            |
| Medical           | 17.7%                                          | 11.8%                                         |
| Overall           | 11.4%                                          | 10.6%                                         |

Table 1: Mean DNA rates before and after the intervention.

Group A: mean DNA rate of months May 13- June 13- July 13- August 13 and September 13.

Group B: mean DNA rate of months October 13- November 13- December 13- January 14- February 14 and March 14.

|                | Psychology mean DNA rate | Care coordination mean DNA rate | Medical mean DNA rate | Overall mean DNA rate |
|----------------|--------------------------|---------------------------------|-----------------------|-----------------------|
| May 2013       | 25%                      | 8.1%                            | 20.7%                 | 17.9%                 |
| June 2013      | 0%                       | 8.9%                            | 20.8%                 | 9.9%                  |
| July 2013      | 0%                       | 7.1%                            | 14.5%                 | 7.2%                  |
| August 2013    | 11.4%                    | 8.1%                            | 12.6%                 | 10.7%                 |
| September 2013 | 11.2%                    | 7.1%                            | 16.8%                 | 11.7%                 |
| October 2013   | 4.9%                     | 6.1%                            | 10.1%                 | 7%                    |
| November 2013  | 5.2%                     | 6.5%                            | 8.9%                  | 6.9%                  |
| December 2013  | 14.3%                    | 10%                             | 12.2%                 | 12.2%                 |

|               |       |       |       |       |
|---------------|-------|-------|-------|-------|
| January 2014  | 9.9%  | 11.4% | 14.8% | 12%   |
| February 2014 | 14.6% | 8.7%  | 12.4% | 11.9% |
| March 2014    | 20.9% | 7.6%  | 12.6% | 13.7% |
|               |       |       |       |       |

Table 2 shows mean DNA rate by discipline over each month from beginning of the project until the end of it.
